# Supplementary material
Source: publisher figshare collection journal article supplement (https://gsapubs.figshare.com/ndownloader/files/40053523)
Supplement: Supplementary file 1 [file 40053523]

## Sheet: Sheet1
Samples name	GN(n)	Rho-S (105cm-2) (NS)	Rho-I (105cm-2) (Ni)	Rho-D (105cm-2) (Nd)	P(χ2) (%)	Dispersion	Pooled age (Ma) (±1σ)	Central age (Ma) (±1σ)	L±SD(μm)	No.(n)	Mean Dpar (Range) (μm)
XG-03	23	6.122 (342)	26.903 (1503)	19.7 (15873)	0.32	0.28	59.3±4.0	59.5±5.5	——	——	——
XG-04	27	8.112 (562)	26.242 (1818)	19.3 (15873)	65.86	0.05	78.8±4.5	78.8±4.6	11.03±1.44	105	2.23
XG-05	32	5.351 (441)	21.889 (1804)	18.2 (15873)	7.2	0.18	58.9±3.6	60.9±4.3	——	——	——
XG-06	30	4.614 (380)	20.632 (1699)	17.7 (15873)	16.84	0.13	52.4±3.4	53.1±3.7	——	——	——
XG-07	17	4.988 (130)	21.756 (567)	18.4 (15873)	36.84	0.14	55.8±5.7	55.9±6.1	——	——	——
XG-08	31	5.348 (344)	17.846 (1148)	14.3 (15873)	32.34	0.06	56.7±3.9	56.8±4.0	9.91±1.5	15	1.41
XG-09	26	3.966 (215)	11.068 (600)	14 (14609)	0.85	0.34	66.3±5.7	69.7±7.6	10.33±1.48	31	1.55
XG-10	28	6.008 (459)	18.966 (1449)	15.8 (15873)	6.87	0.17	66.2±4.1	68.5±4.9	15.11±1.96	6	3.5
XG-11	22	5.69 (309)	21.95 (1192)	19.5 (15873)	41.03	0.09	66.8±4.7	67.0±5.0	——	——	——
